# Supplementary material
Source: PubMed Central journal article supplement (PMC6170006)

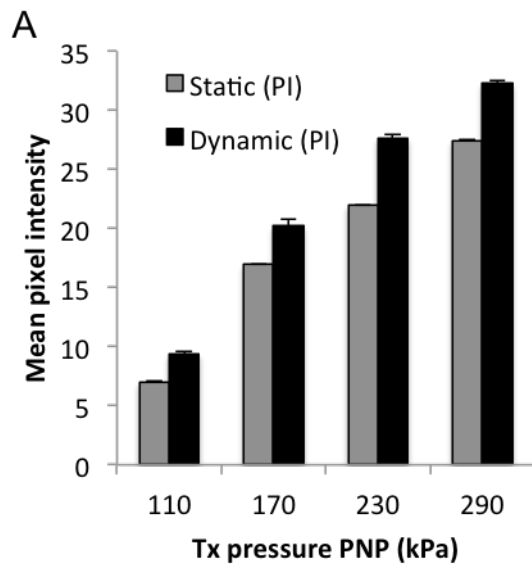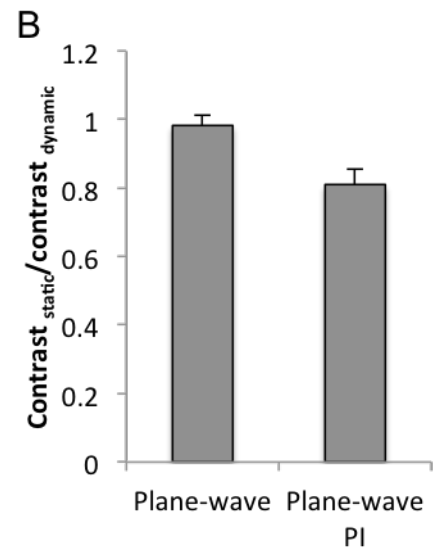

Supplement: NIHMS972542-supplement-1.pdf [file NIHMS972542-supplement-1.pdf]
